# Supplementary material for: Telmisartan, Ramipril, or Both in Patients at High Risk for Vascular Events
Source: Atypon-hosted journal article supplement (doi:10.1056/nejmoa0801317), 2008-03-31
Supplement: nejm_ontarget_1547sa1.pdf [file nejm_ontarget_1547sa1.pdf]

## Supplementary Appendix

This appendix has been provided by the authors to give readers additional information about their work.

Supplement to: The ONTARGET investigators. Telmisartan, ramipril, or both in patients at high risk for vascular events. *N Engl J Med* 2008;358:1547-59. DOI: 10.1056/NEJMoa0801317.

## **Appendix 1: Patient Eligibility Criteria**

---

### **Inclusion criteria**

---

Individuals  $\geq 55$  years of age with 1 of the following

|                           |                                                                                                                                                                                                                                                                                                      |
|---------------------------|------------------------------------------------------------------------------------------------------------------------------------------------------------------------------------------------------------------------------------------------------------------------------------------------------|
| Coronary artery disease   | Previous myocardial infarction ( $>2$ days post uncomplicated MI)<br>Stable angina or unstable angina $>30$ days with documented evidence of multivessel coronary artery disease<br>Multi-vessel PTCA $>30$ days<br>Multi-vessel CABG surgery $>4$ years, or with recurrent angina following surgery |
| Peripheral artery disease | Previous limb bypass surgery or angioplasty<br>Previous limb or foot amputation<br>Intermittent claudication, with ankle:arm BP ratio $\leq 0.80$ on at least 1 side<br>Significant peripheral artery stenosis ( $>50\%$ ) documented by angiography or non-invasive testing                         |
| Cerebrovascular disease   | Previous stroke<br>Transient ischemic attacks $>7$ days and $<1$ year                                                                                                                                                                                                                                |
| Diabetes Mellitus         | High-risk diabetes with evidence of end-organ damage                                                                                                                                                                                                                                                 |

---

### **Exclusion criteria**

---

|                        |                                                                                                                                                                                                                                                                                                                                                                                                              |
|------------------------|--------------------------------------------------------------------------------------------------------------------------------------------------------------------------------------------------------------------------------------------------------------------------------------------------------------------------------------------------------------------------------------------------------------|
| Medication use         | Inability to discontinue ACE inhibitors or ARB<br>Known hypersensitivity or intolerance to ACE inhibitors or ARB                                                                                                                                                                                                                                                                                             |
| Cardiovascular disease | Congestive heart failure<br>Hemodynamically significant valvular or outflow tract obstruction<br>Constrictive pericarditis<br>Complex congenital heart disease<br>Syncope episodes of unknown etiology $<3$ months<br>Planned cardiac surgery or PTCA $<3$ months<br>Uncontrolled hypertension on treatment (eg, BP $>160/100$ mm Hg)<br>Heart transplant recipient<br>Stroke due to subarachnoid hemorrhage |
| Other conditions       | Significant renal artery disease<br>Hepatic dysfunction<br>Uncorrected volume or sodium depletion<br>Primary hyperaldosteronism<br>Hereditary fructose intolerance<br>Other major noncardiac illness or expected to reduce life expectancy or significant disability interfere with study participation<br>Simultaneously taking another experimental drug<br>Unable to provide written informed consent     |

---
